# Supplementary material for: The effect of Aspalathus linearis (Burm.f.) R.Dahlgren and its compounds on tyrosinase and melanogenesis
Source: PubMed Central journal article supplement (PMC8007633; doi:10.1038/s41598-021-86410-z), 2021-03-29
Supplement: 41598_2021_86410_MOESM1_ESM.pdf [file 41598_2021_86410_MOESM1_ESM.pdf]

## SUPPORTING INFORMATION:

### The Effect of *Aspalathus linearis* (Burm.f.)

# R.Dahlgren and its Compounds on Tyrosinase and Melanogenesis

*Analike Blom van Staden,<sup>†</sup> Carel B. Oosthuizen,<sup>†</sup> Namrita Lall,<sup>\*,†,‡,§</sup>*

<sup>†</sup>Department of Plant and Soil Sciences, University of Pretoria, Pretoria, South Africa

<sup>‡</sup>School of Natural Resources, University of Missouri, USA

<sup>§</sup>College of Pharmacy, JSS Academy of Higher Education and Research, India

## SI – Table of content

|                                                                                                                        |    |
|------------------------------------------------------------------------------------------------------------------------|----|
| S1 - Quantification of Pure Compounds Using Ultra-Performance Liquid Chromatography – Quantitative Time of Flight..... | 3  |
| S2 - Tyrosinase Assay .....                                                                                            | 5  |
| S3 – Metal Analysis.....                                                                                               | 7  |
| S4 - Computer modelling.....                                                                                           | 8  |
| S5 - Pearson correlation .....                                                                                         | 20 |
| S6 - Quantitative Structure–Activity Relationship Model.....                                                           | 21 |
| S7 - Cytotoxicity Assay.....                                                                                           | 26 |
| S8 - Masson Fontana Assay .....                                                                                        | 27 |

# S1 - Quantification of Pure Compounds Using Ultra-Performance Liquid Chromatography – Quantitative Time of Flight

The spectral data and spectra regarding the Ultra-Performance Liquid Chromatography – Quantitative Time of Flight analysis is provided in Table S 1, and Figure S 1 and S 2.

**Table S 1.** Spectral data of the major secondary chemical compounds present in the ethanolic extract of unfermented *Aspalathus linearis* (Burm.f.) R.Dahlgren and its fractions quantified using Ultra-Performance Liquid Chromatography – Quantitative Time of Flight

| Chemical compounds       | Mode     | Calibration curve      | $R^2$ | LOD <sup>a</sup><br>(ppm) | LOQ <sup>b</sup><br>(ppm) |
|--------------------------|----------|------------------------|-------|---------------------------|---------------------------|
| Aspalathin               | Positive | $y = 26.88x$           | 0.999 | < 0.25                    | < 2.5                     |
| Caffeic acid             | Negative | $y = 112.22x - 7.66$   | 0.999 | < 0.25                    | < 2.5                     |
| Catechin                 | Negative | $y = 15.02x - 10.97$   | 0.999 | < 0.25                    | < 2.5                     |
| Cinnamic acid            | Positive | $y = 0.79x + 2.02$     | 0.997 | < 0.25                    | < 2.5                     |
| (-)-Epicatechin          | Negative | $y = 26.56x - 19.68$   | 0.999 | < 0.25                    | < 0.25                    |
| Ferulic acid             | Negative | $y = 31.39x + 0.75$    | 0.994 | < 0.25                    | < 2.5                     |
| 4-hydroxy benzoic acid   | Negative | $y = 26.00x + 0.13$    | 0.999 | < 25                      | < 25                      |
| Isoquercitrin            | Negative | $y = 95.22x - 50.05$   | 0.999 | < 25                      | < 25                      |
| Luteolin                 | Positive | $y = 0.0545x + 0.23$   | 0.999 | < 0.25                    | < 2.5                     |
| Orientin                 | Positive | $y = 0.03x + 0.26$     | 0.981 | < 0.25                    | < 2.5                     |
| <i>p</i> -Coumaric acid  | Negative | $y = 106.42x - 3.15$   | 0.993 | < 0.25                    | < 2.5                     |
| <i>n</i> -Propyl gallate | Negative | $y = 336.83x - 56.28$  | 0.992 | < 0.25                    | < 0.25                    |
| Quercetin                | Positive | $y = 93.33x - 90.54$   | 0.995 | < 2.5                     | < 2.5                     |
| Rosmarinic acid          | Negative | $y = 63.19x - 8.43$    | 0.995 | < 25                      | < 25                      |
| Syringic acid            | Negative | $y = 25.24x - 3.36$    | 0.994 | < 0.25                    | < 2.5                     |
| Vanillic acid            | Negative | $y = 1.55x - 0.003$    | 0.999 | < 0.25                    | < 2.5                     |
| Vitexin                  | Positive | $y = 195.37x - 175.73$ | 0.996 | < 0.025                   | < 0.25                    |

<sup>a</sup> Limit of Detection, <sup>b</sup> Limit of quantification.

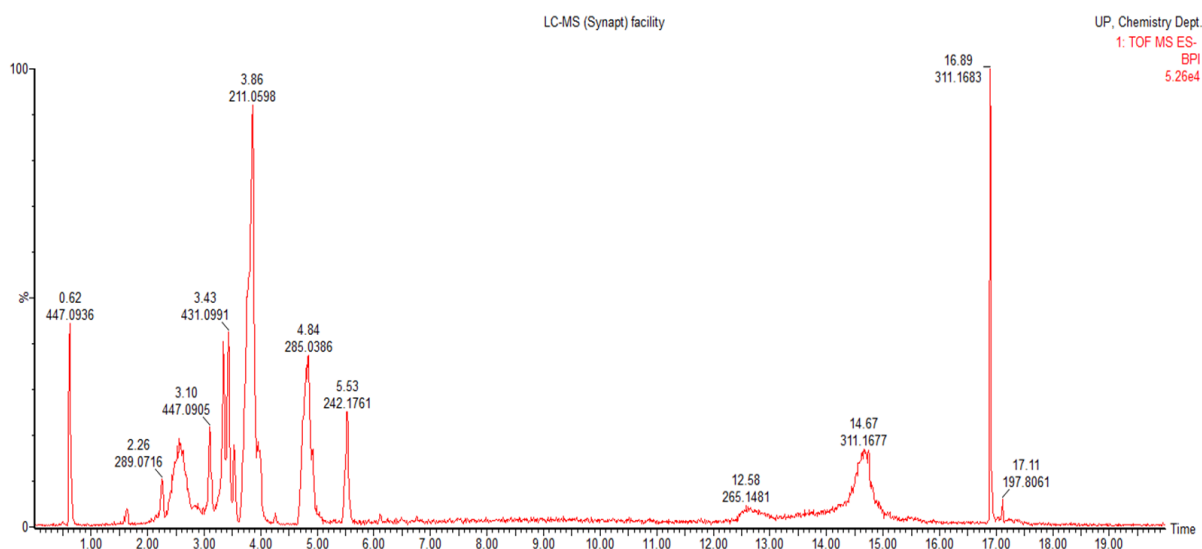

**Figure S 1:** UPLC-QTOF spectra in negative mode of the ethanolic extract of *Aspalathus linearis* (Burm.f.) R.Dahlgren

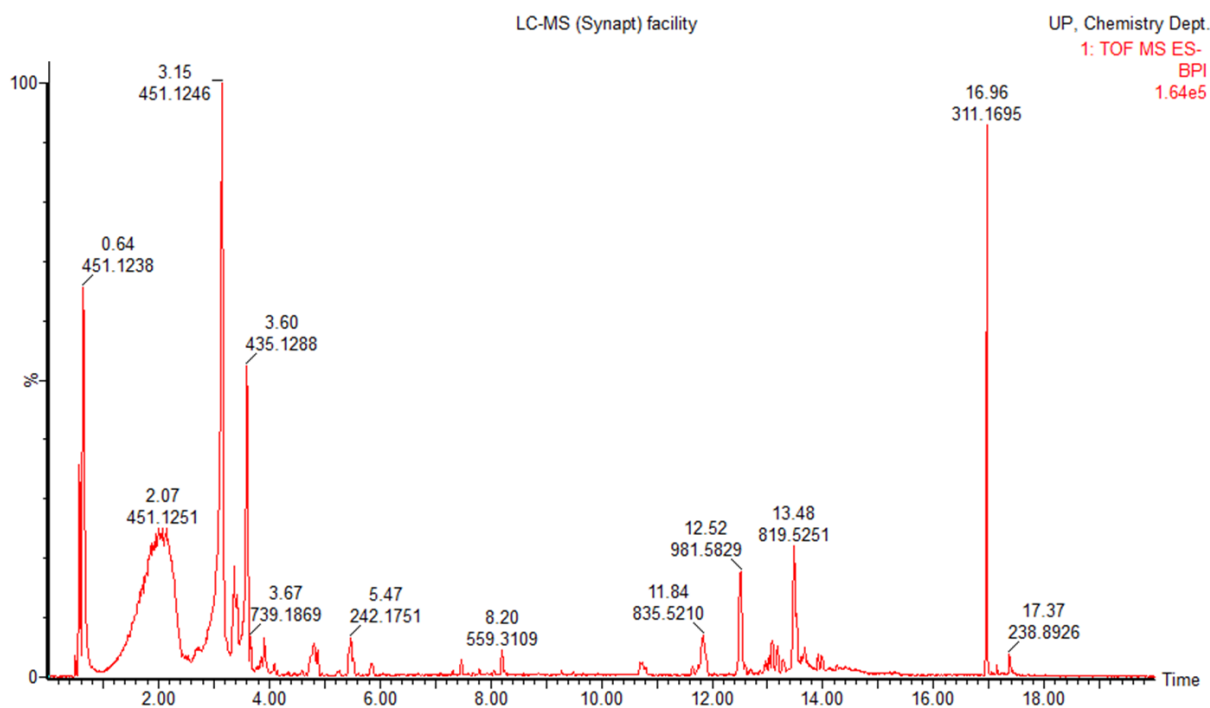

**Figure S 2:** UPLC-QTOF spectra in positive mode of the ethanolic extract of *Aspalathus linearis* (Burm.f.) R.Dahlgren

## S2 - Tyrosinase Assay

The data for the tyrosinase kinetic studies is provided in Figure S 3 to S 5.

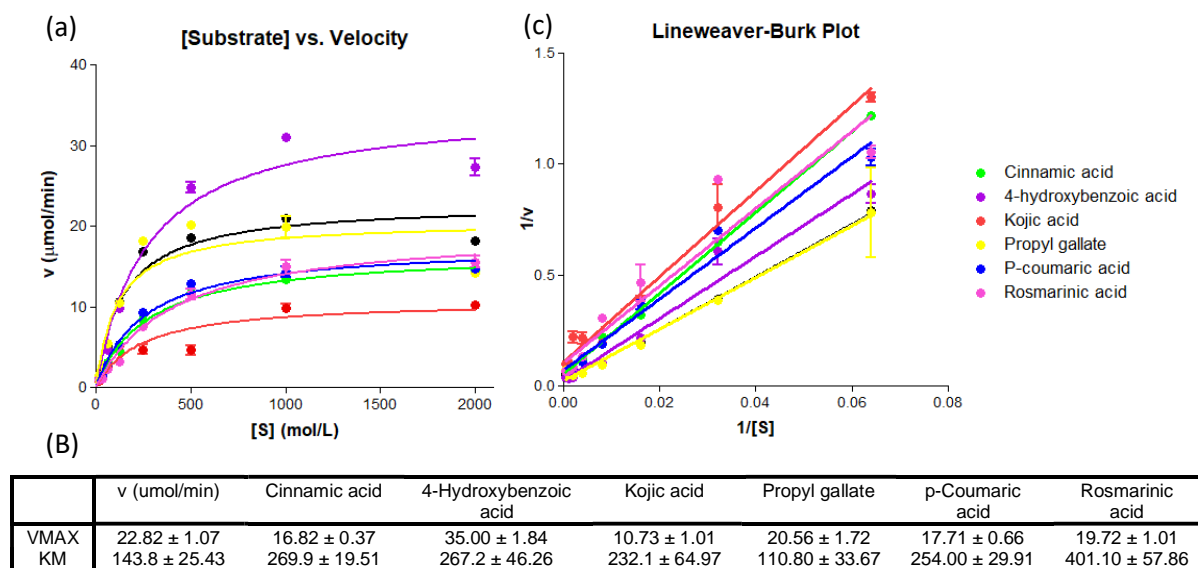

**Figure S 3:** Enzyme kinetics, namely (a) Michaelis-Menten Plot, (b) Michaelis-Menten Plot data and (c) Lineweaver-Burk Plot of the inhibitors present in *Aspalathus linearis* (Burm.f.) R.Dahlgren (<https://www.graphpad.com>; GraphPad Prism 5).

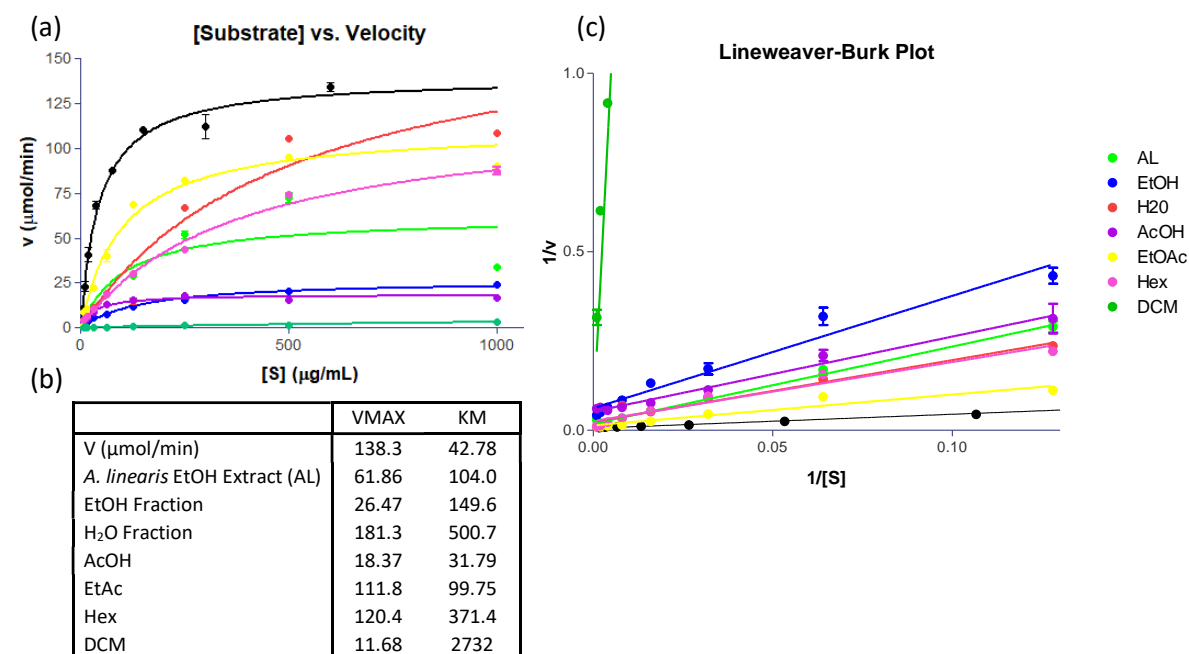

**Figure S 4:** Enzyme kinetics, namely (a) Michaelis-Menten Plot, (b) Lineweaver-Burk Plot of the ethanolic extract of *Aspalathus linearis* (Burm.f.) R.Dahlgren and its major fractions (<https://www.graphpad.com>; GraphPad Prism 5).

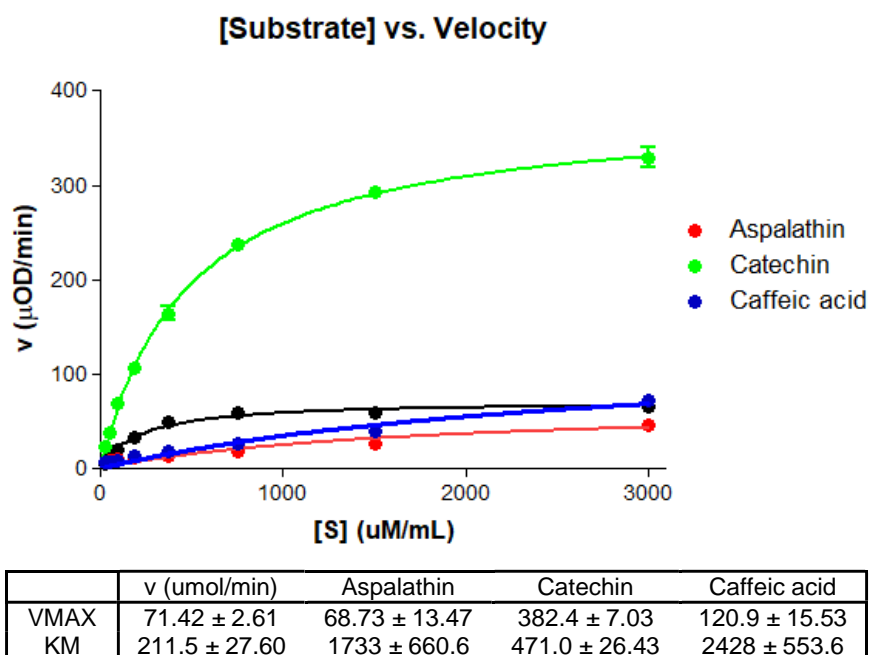

**Figure S 5:** Michaelis-Menten Plot of the subversive substrates found in the ethanolic extract of *Aspalathus linearis* (Burm.f.) R.Dahlgren. The curve represents the rate of the tyrosinase enzyme in the absence of the substrate L-dopa (<https://www.graphpad.com>; GraphPad Prism 5).

## S3 – Metal Analysis

The metal analysis report obtained from Merieux laboratory is provided in Figure S 6.

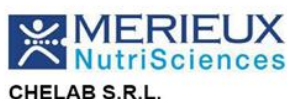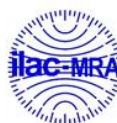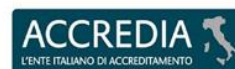

LAB N° 0051

### TEST REPORT N. 19/000002120

date of issue 03/01/2019

Customer ID 0068079/001

Messrs  
SWIFT SILLIKER (PTY) LTD  
7 WARRINGTON RD  
CLAREMONT  
7708  
ZA

#### Sample information

Acceptance number 18.654338.0002  
Delivered by Fedex on 27/12/2018  
Receiving Date 27/12/2018  
Place of origin SWIFT SILLIKER (PTY) LTD 7 WARRINGTON RD CLAREMONT 7708 ZA  
Sample Description SSGT 2398 AL UNIVERSITY OF PRETORIA

#### Sampling information

Sampled by Customer

#### ANALYTICAL RESULTS

|                                      | Value/Uncertain | Unit of measure | LoQ    | LoD    | Start/end date of analysis | Op. units | Ro w |
|--------------------------------------|-----------------|-----------------|--------|--------|----------------------------|-----------|------|
| <b>ON SAMPLE AS IT IS</b>            |                 |                 |        |        |                            |           | 1    |
| ARSENIC<br>Met.: MP 1288 rev 14 2018 | n.d.            | mg/kg           | 0,010  | 0,0067 | 31/12/2018-<br>-03/01/2019 | 02        | 2    |
| CADMIUM<br>Met.: MP 1288 rev 14 2018 | n.d.            | mg/kg           | 0,0050 | 0,0017 | 31/12/2018-<br>-03/01/2019 | 02        | 3    |
| MERCURY<br>Met.: MP 1288 rev 14 2018 | n.d.            | mg/kg           | 0,0050 | 0,0017 | 31/12/2018-<br>-03/01/2019 | 02        | 4    |
| LEAD<br>Met.: MP 1288 rev 14 2018    | n.d.            | mg/kg           | 0,0050 | 0,0017 | 31/12/2018-<br>-03/01/2019 | 02        | 5    |
| COPPER<br>Met.: MP 1288 rev 14 2018  | 0,060±0,034     | mg/kg           | 0,050  | 0,017  | 31/12/2018-<br>-03/01/2019 | 02        | 6    |

#### Operative units

Unit 02 : Via Castellana Resana (TV)

Chemical responsible

Laboratory manager

- The line marked by a star (\*) is not accredited by Accredia, member of MLA. - If not otherwise specified, the uncertainty is extended and has been calculated with a coverage factor k=2 corresponding to a probability interval of about 95%. - LoD is the detection limit and identifies a confidence interval of zero with a probability interval of about 99%. - LoQ is the limit of quantification. "n.d." is not detected and indicates a value inferior to the LoD. "traces (X)" means a value between LoD and LoQ, this value is indicative. "<x" or ">x" indicate inferior or superior to the measurement field of the test. - If not differently specified, the sums are calculated by lower bound criteria (L.B.). - Registration with the number 7 of the Regional List of the laboratories of the Regione Veneto which perform analyses as regards the procedures for the food safety in food industries, as reported in Annex A of DDR n°73 of 16th January 2008

Template 716/SQ rev. 8

Page 2 of 2

Report digitally signed in accordance with Legislative Decree No.82 of March, the 7th, 2005 and s.m.i

The results contained in this Test Report refer only to the analyzed sample. The test report shall not be reproduced except in full, without written approval of Chelab laboratory.

CHELAB S.r.l. Socio Unico, Company subject to the direction and coordination of Mérieux NutriSciences Corporation  
Head office: Via Fratta 25 31023 Resana, Italy Phone. + 39 0423.7177 / Fax + 39 0423.715058 www.merieuxnutrisciences.it  
VAT nr. 01500900269, R. E. A. Treviso n. 156079 Fully paid up € 103.480,00.

**Figure S 6:** Metal analysis report of the ethanolic extract of *Aspalathin linearis* (Burm.f.) R.Dahlgren conducted by Merieux laboratories.

## S4 - Computer modelling

The ChemSpider database IDs for the compounds are provided in Table S2. The docking of compounds **1** to **15** and kojic acid is provided in Figure S 7- S 10 for the tyrosinase and tyrosinase protein 1 structures. Please note that only the structures of aspalathin (**1**) and catechin (**3**) are provided in the manuscript.

**Table S 2** ChemSpider database IDs for the compounds docked in the 2Y9X and 5M8P protein structures

| <b>Compound</b>          | <b>ChemSpider ID</b> |
|--------------------------|----------------------|
| Aspalathin               | 9457391              |
| Caffeic acid             | 600426               |
| Catechin                 | 8711                 |
| Cinnamic acid            | 392447               |
| <i>p</i> -Coumaric acid  | 553148               |
| Ferulic acid             | 393368               |
| 4-Hydroxybenzoic acid    | 132                  |
| Isoquercetrin            | 4444361              |
| Kojic acid               | 3708                 |
| Luteolin                 | 4444102              |
| <i>n</i> -Propyl gallate | 4778                 |
| Quercetin                | 12269344             |
| Rosmarinic acid          | 4445104              |
| Syringic acid            | 10289                |
| Vanillic acid            | 8155                 |
| Vitexin                  | 4444098              |



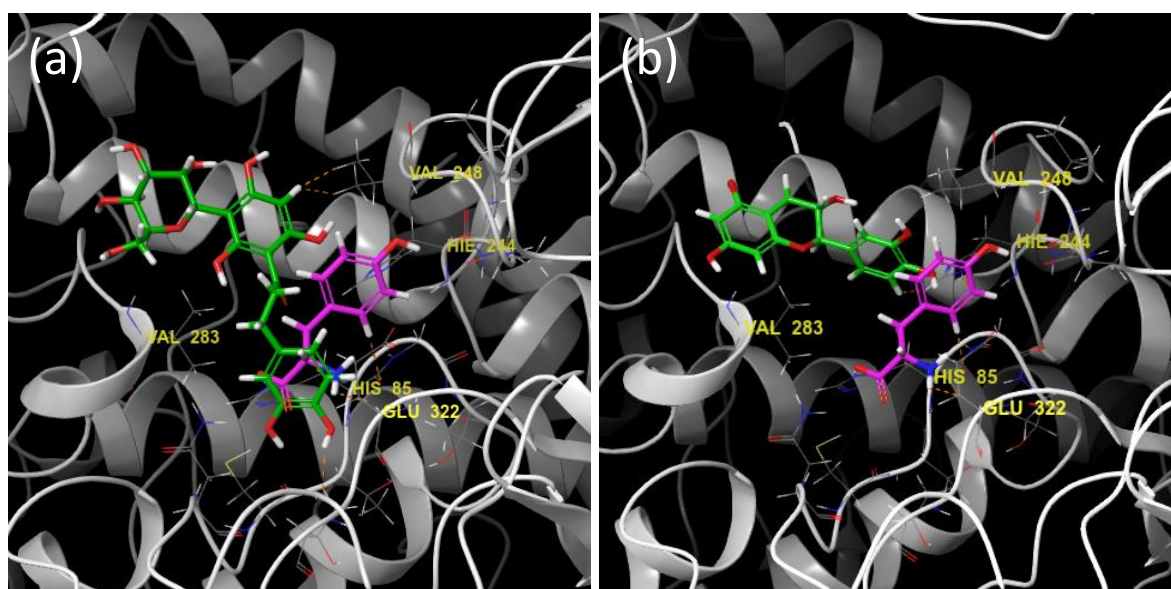

**Figure S 7:** The docking pose of (a) aspalathin (1) and (b) catechin (2) was compared to L-tyrosine and showed similar binding and alignment of the core structure to the binding site (<https://www.schrodinger.com/maestro>; version 12.1.013, release 2019-3).

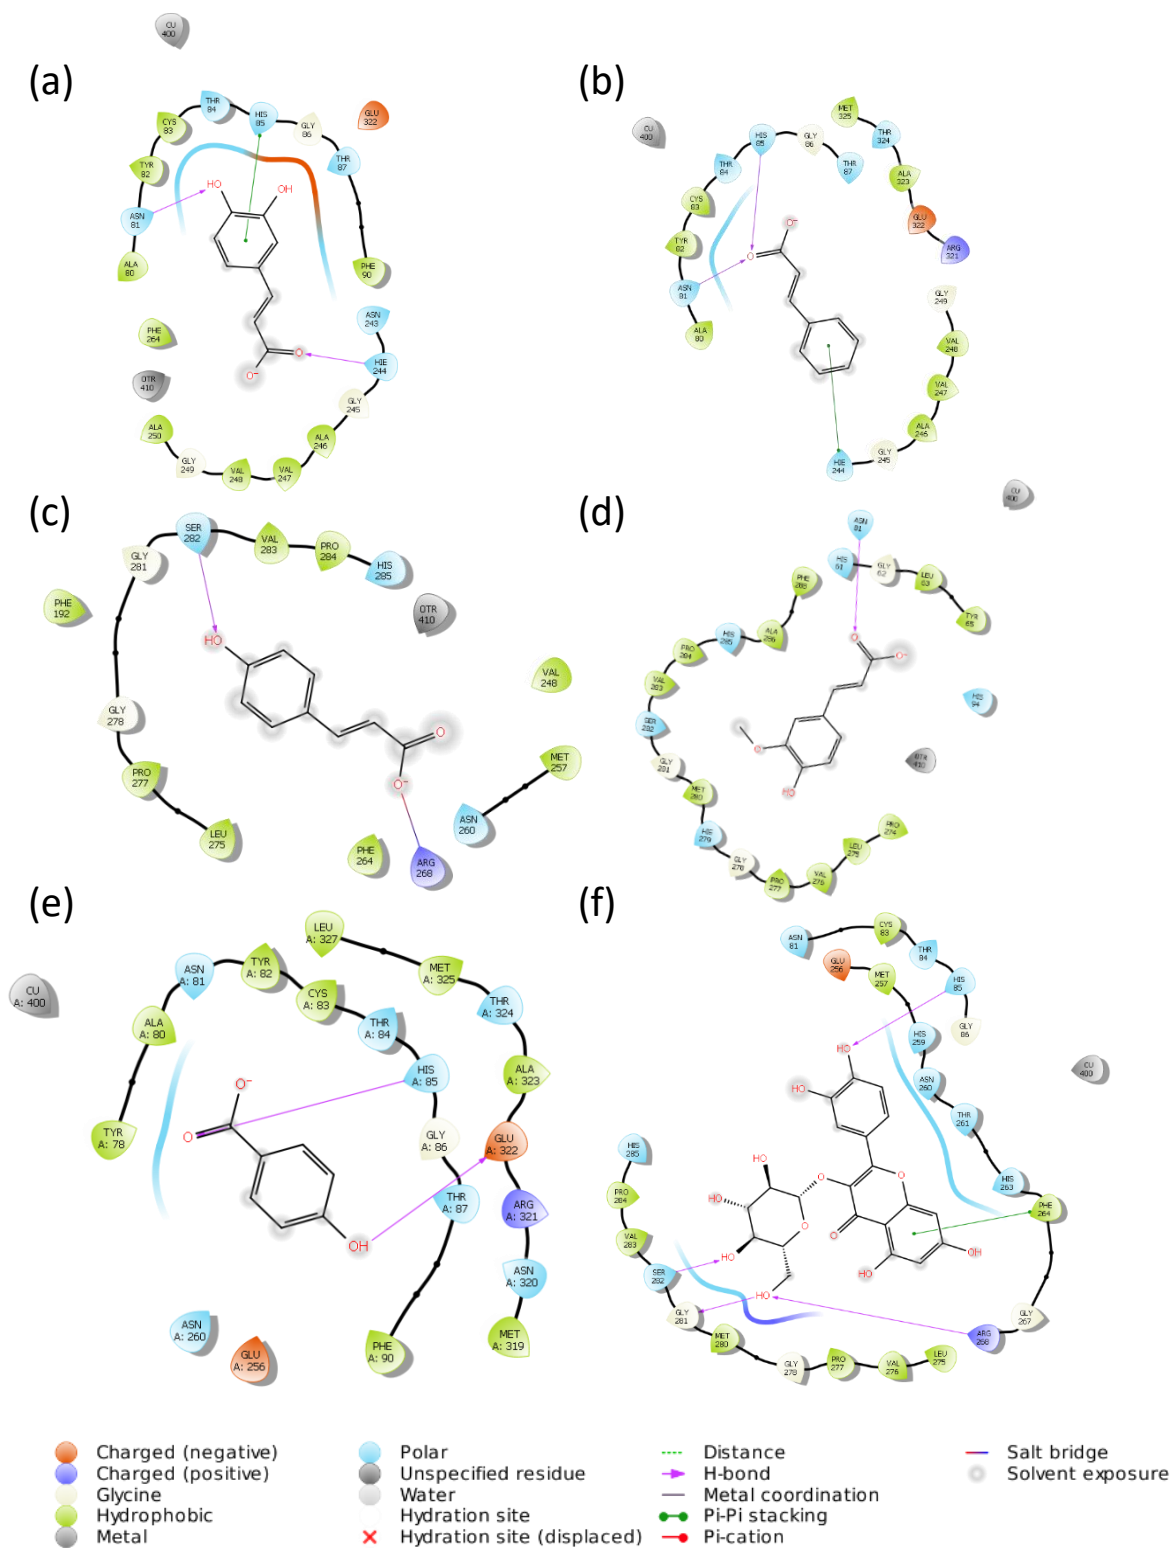

**Figure S 8:** Two-dimensional protein-ligand interactions of (a) caffeic acid, (b) cinnamic acid, (c) *p*-coumaric acid, (d) ferulic acid, (e) 4-hydroxybenzoic acid and (f) isoquercitrin with the 2Y9X tyrosinase enzyme structure (<https://www.schrodinger.com/maestro>; version 12.1.013, release 2019-3).

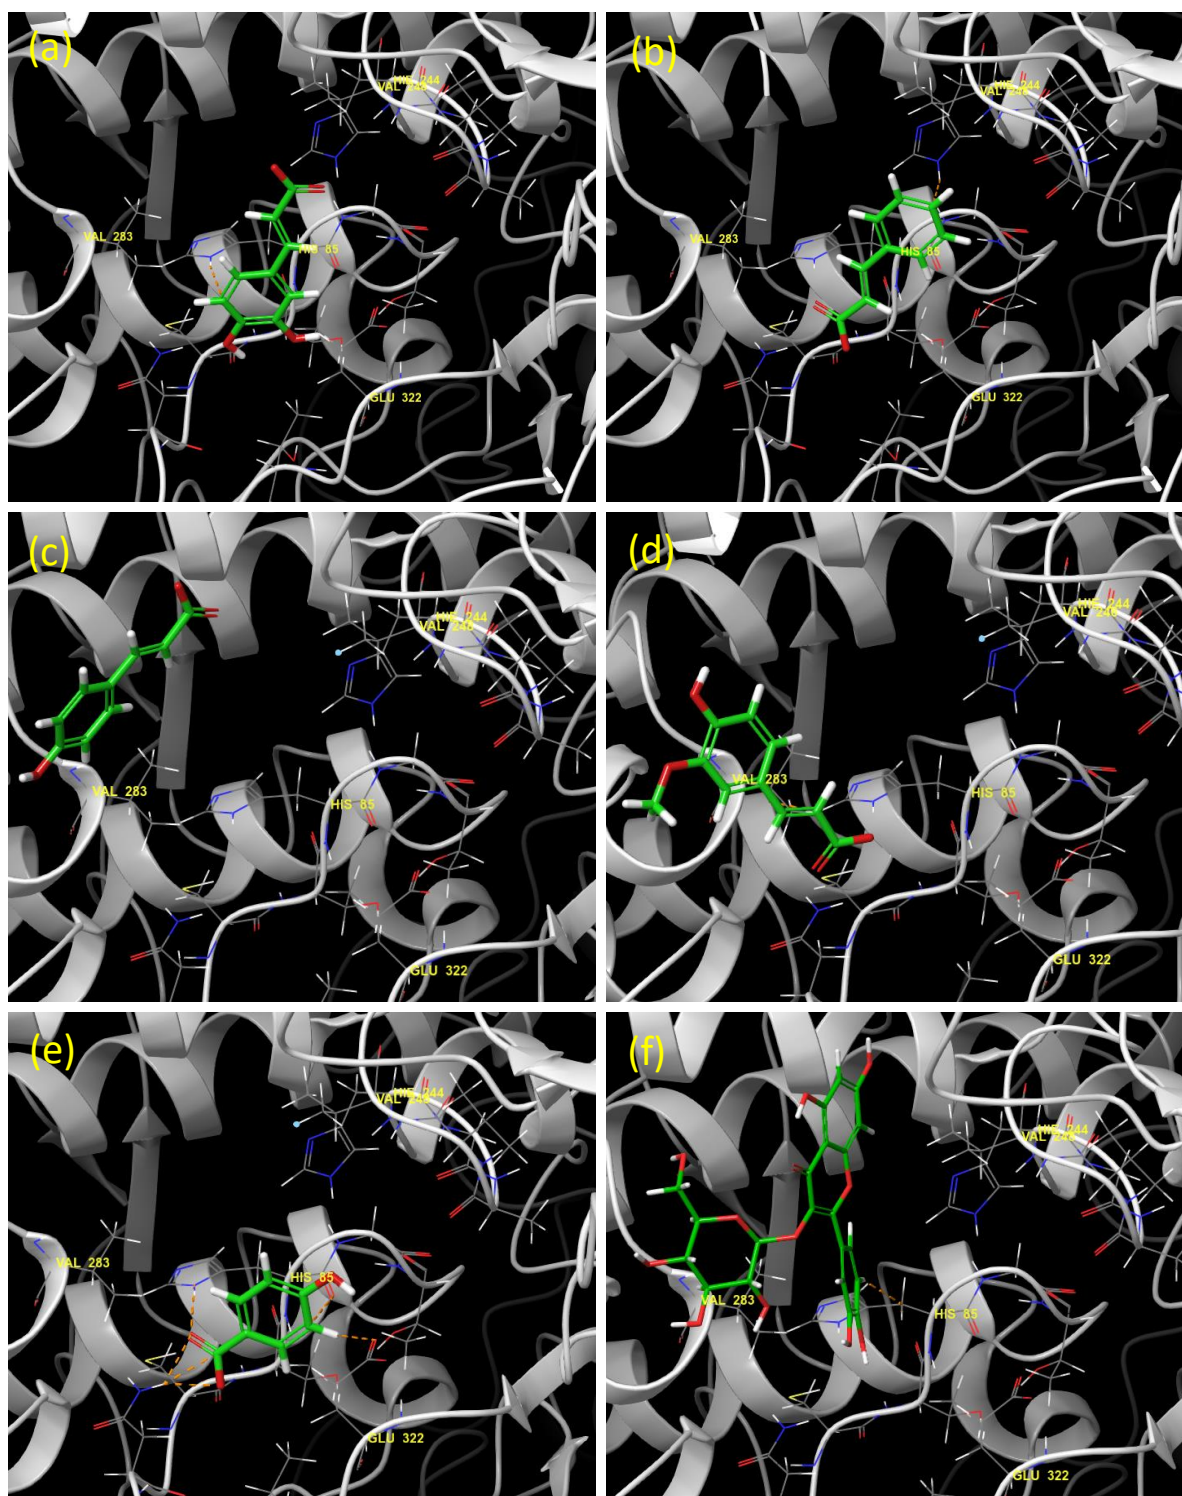

**Figure S 9:** Three-dimensional protein-ligand interactions of (a) caffeic acid, (b) cinnamic acid, (c) *p*-coumaric acid, (d) ferulic acid, (e) 4-hydroxybenzoic acid and (f) isoquercitrin with the 2Y9X tyrosinase enzyme structure (<https://www.schrodinger.com/maestro>; version 12.1.013, release 2019-3).

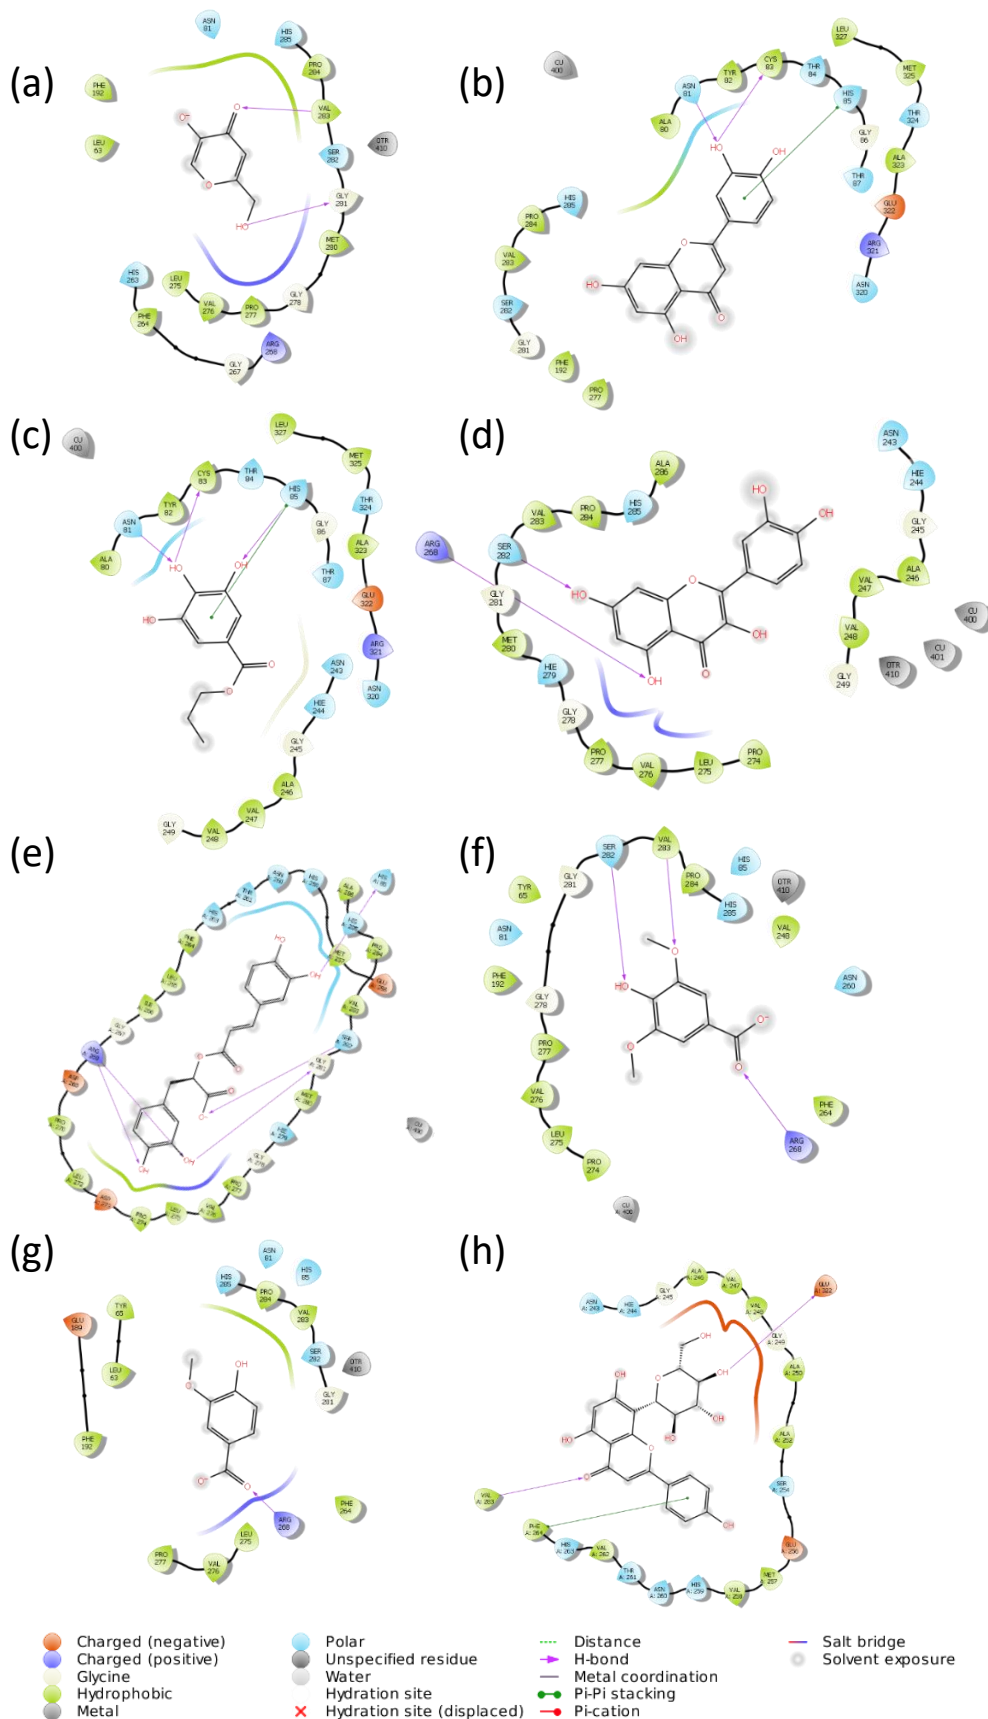

**Figure S 10:** Two-dimensional protein-ligand interactions of (a) kojic acid, (b) luteolin, (c) *n*-propyl gallate, (d) quercetin, (e) rosmarinic acid, (f) syringic acid, (g) vanillic acid and (h) vitexin with the 2Y9X tyrosinase enzyme structure (<https://www.schrodinger.com/maestro>; version 12.1.013, release 2019-3).

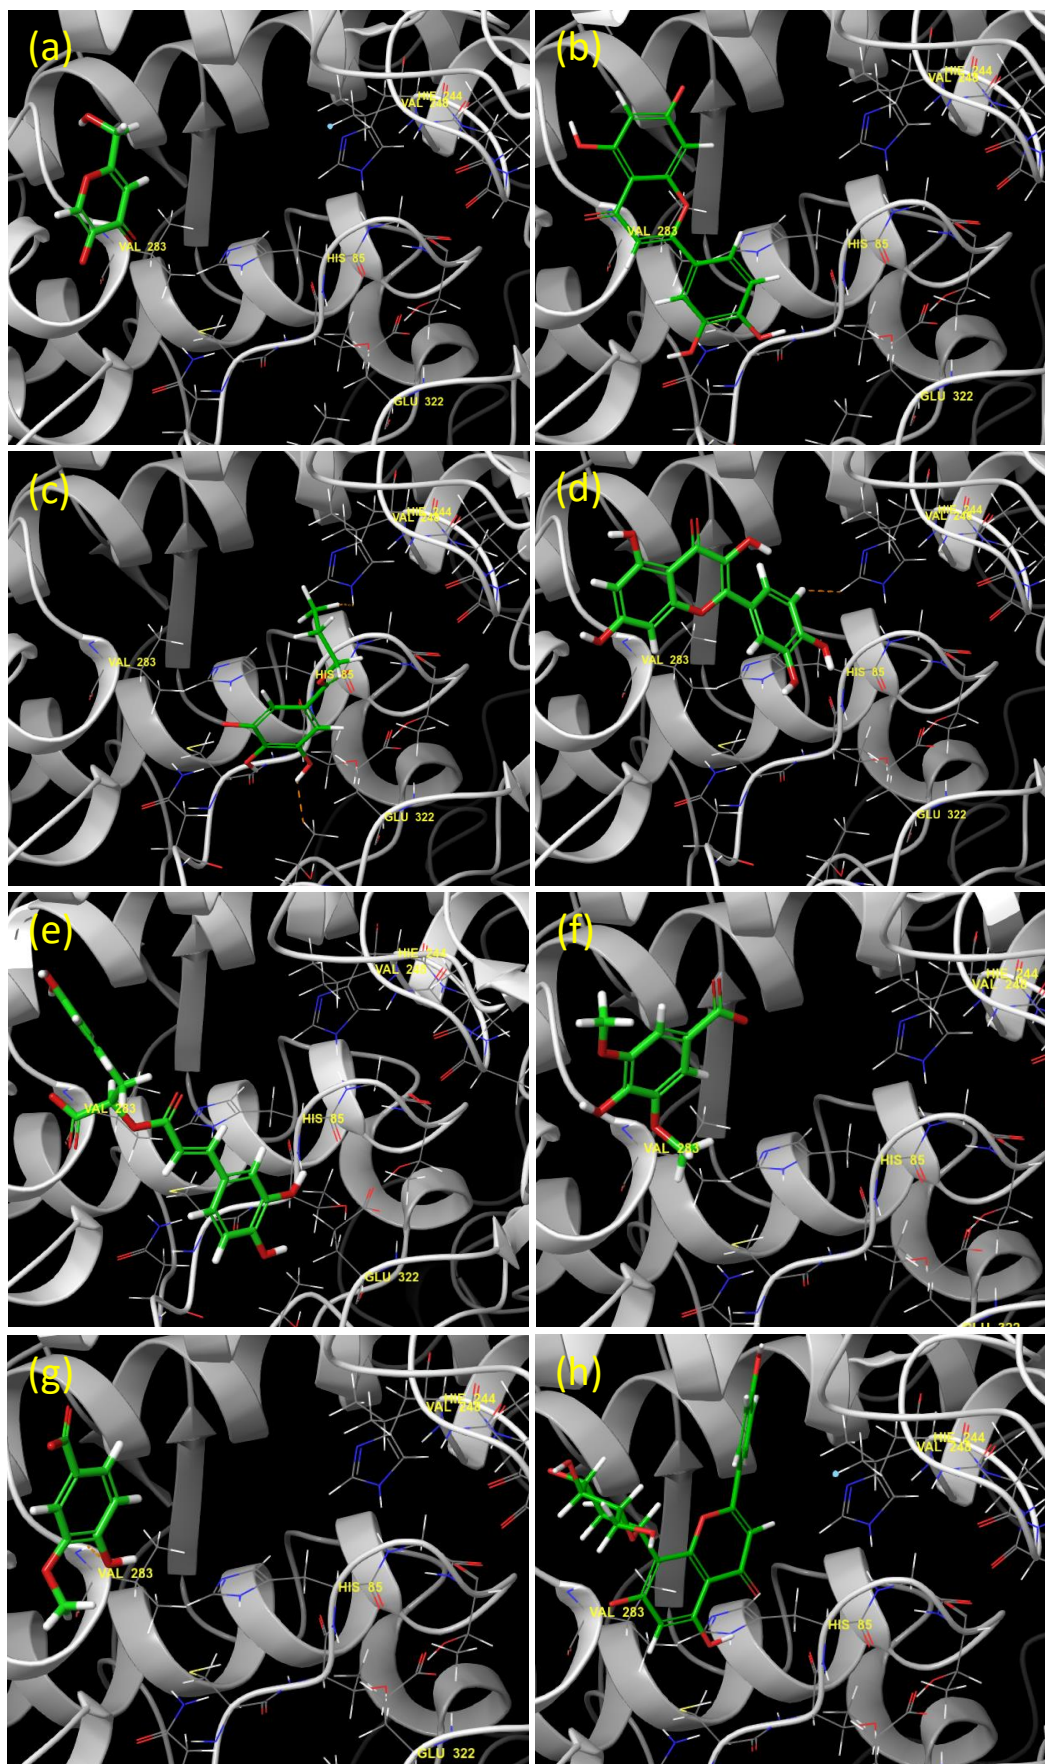

**Figure S 11:** Three-dimensional protein-ligand interactions of (a) kojic acid, (b) luteolin, (c) *n*-propyl gallate, (d) quercetin, (e) rosmarinic acid, (f) syringic acid, (g) vanillic acid and (h) vitexin with the 2Y9X tyrosinase enzyme structure (<https://www.schrodinger.com/maestro>; version 12.1.013, release 2019-3).

**Table S 3.** Hydrogen bond lengths between the compounds and the amino acids at the active site of the tyrosinase structure (PBD: 2Y9X) (<https://www.schrodinger.com/maestro>; version 12.1.013, release 2019-3).

| Compound                      | Hydrogen bond lengths 2Y9X |        |        |         |         |         |         |         |         |         |         |
|-------------------------------|----------------------------|--------|--------|---------|---------|---------|---------|---------|---------|---------|---------|
|                               | HIS 85                     | CYS 83 | ASN 81 | SER 282 | GLY 281 | ARG 268 | HIE 244 | GLU 322 | VAL 283 | ARG 250 | ALA 246 |
| Aspalathin (1)                | 2.21                       | 1.96   | 1.99   | 2.06    | 1.91    | 2.19    |         |         |         |         |         |
| Caffeic acid (2)              |                            |        | 1.92   |         |         |         | 2.07    |         |         |         |         |
| Catechin (3)                  |                            |        |        | 2.01    | 2.37    |         | 2.41    |         |         |         |         |
| Cinnamic acid (4)             | 1.90                       |        | 2.18   |         |         |         |         |         |         |         |         |
| Ferulic acid (5)              |                            |        | 2.01   |         |         |         |         |         |         |         |         |
| 4-Hydroxybenzoic acid (6)     | 1.81                       |        |        |         |         |         |         | 2.02    |         |         |         |
| Isoquercitrin (7)             | 2.24                       |        |        | 1.94    | 2.07    | 2.21    |         |         |         |         |         |
| Luteolin (8)                  |                            | 2.23   | 2.01   |         |         |         |         |         |         |         |         |
| p-Coumaric acid (9)           |                            |        |        | 1.90    |         |         |         |         |         |         |         |
| <i>n</i> -Propyl gallate (10) | 2.31                       | 2.09   | 2.09   |         |         |         |         |         |         |         |         |
| Quercetin (11)                |                            |        |        | 1.86    |         | 2.13    |         |         |         |         |         |
| Rosmarinic acid (12)          | 2.34                       |        |        | 2.06    | 1.81    |         |         |         |         | 2.34    |         |
| Syringic acid (13)            |                            |        |        | 2.09    |         | 2.05    |         |         | 2.10    |         |         |
| Vanillic acid (14)            |                            |        |        |         |         | 1.63    |         |         |         |         |         |
| Vitexin (15)                  |                            |        |        |         |         |         |         | 1.97    | 2.73    |         |         |
| Kojic acid                    |                            |        |        |         | 1.81    |         |         |         | 2.22    |         |         |
| L-tyrosine                    | 2.04                       |        | 2.73   |         |         |         |         | 2.52    |         |         | 2.11    |

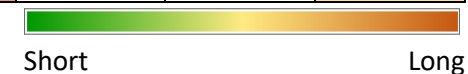

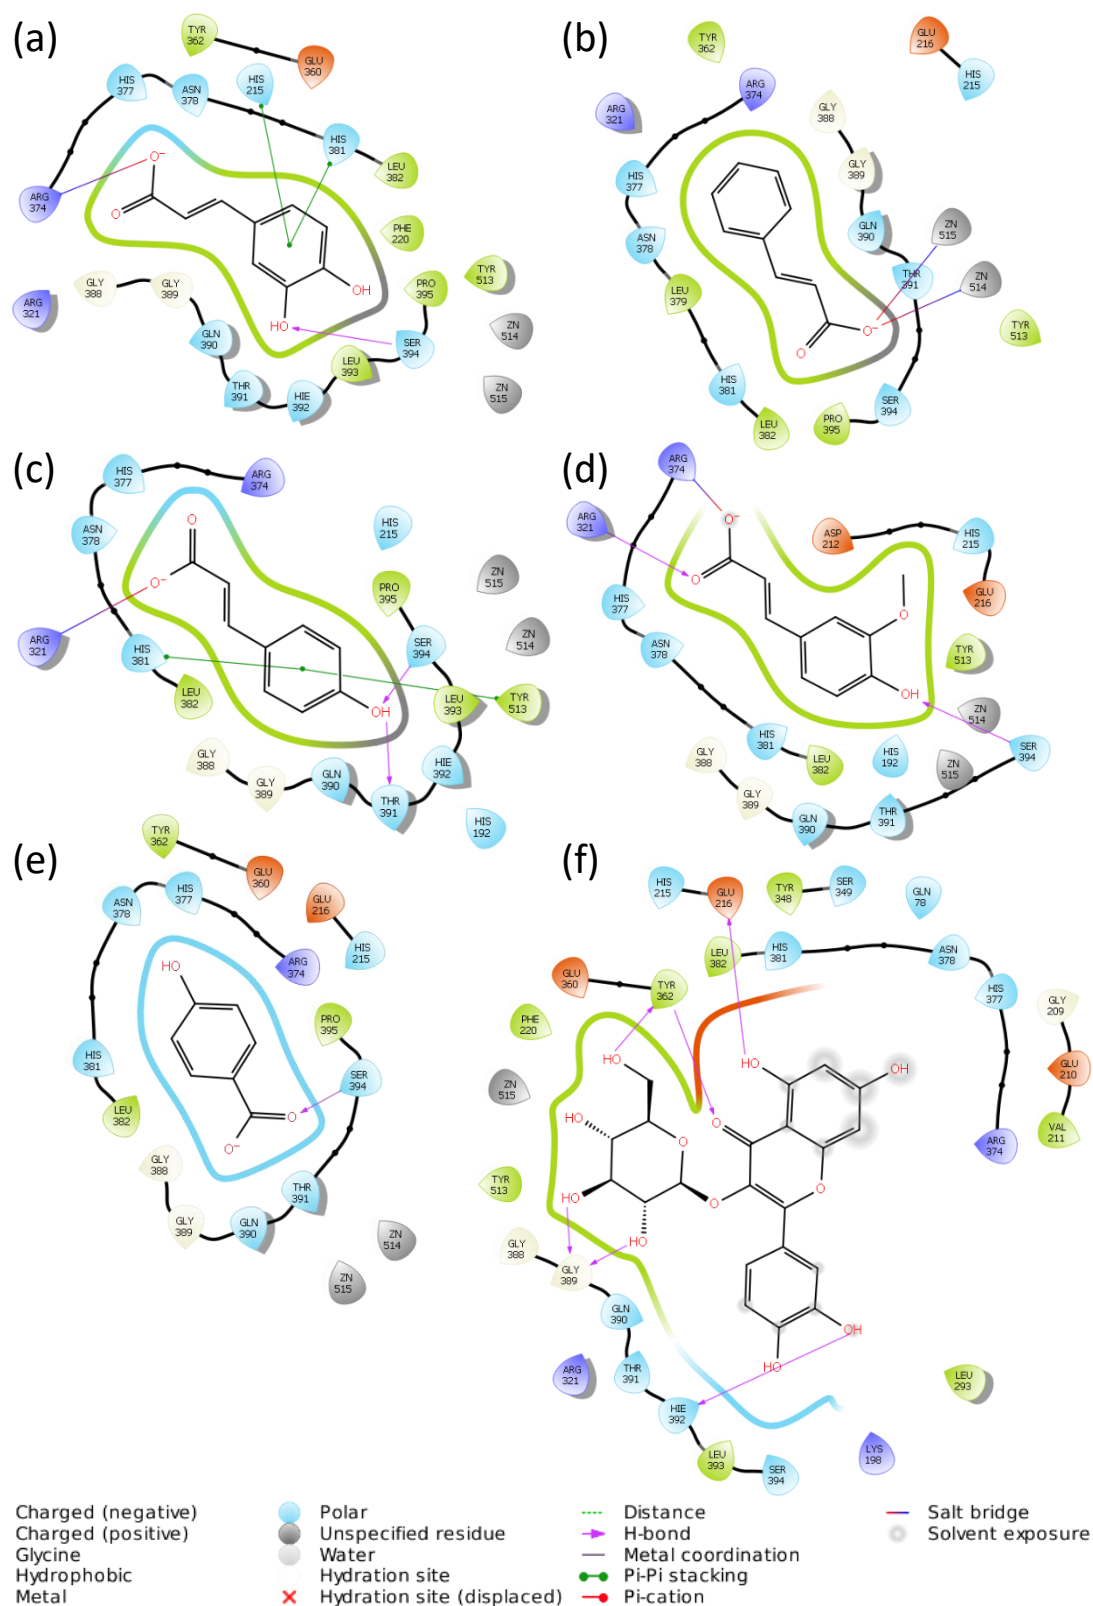

**Figure S 12:** Two-dimensional protein-ligand interactions of (a) caffeic acid, (b) cinnamic acid, (c) *p*-coumaric acid, (d) ferulic acid, (e) 4-hydroxybenzoic acid and (f) isoquercitrin with the 5M8P tyrosinase protein 1 structure (<https://www.schrodinger.com/maestro>; version 12.1.013, release 2019-3).

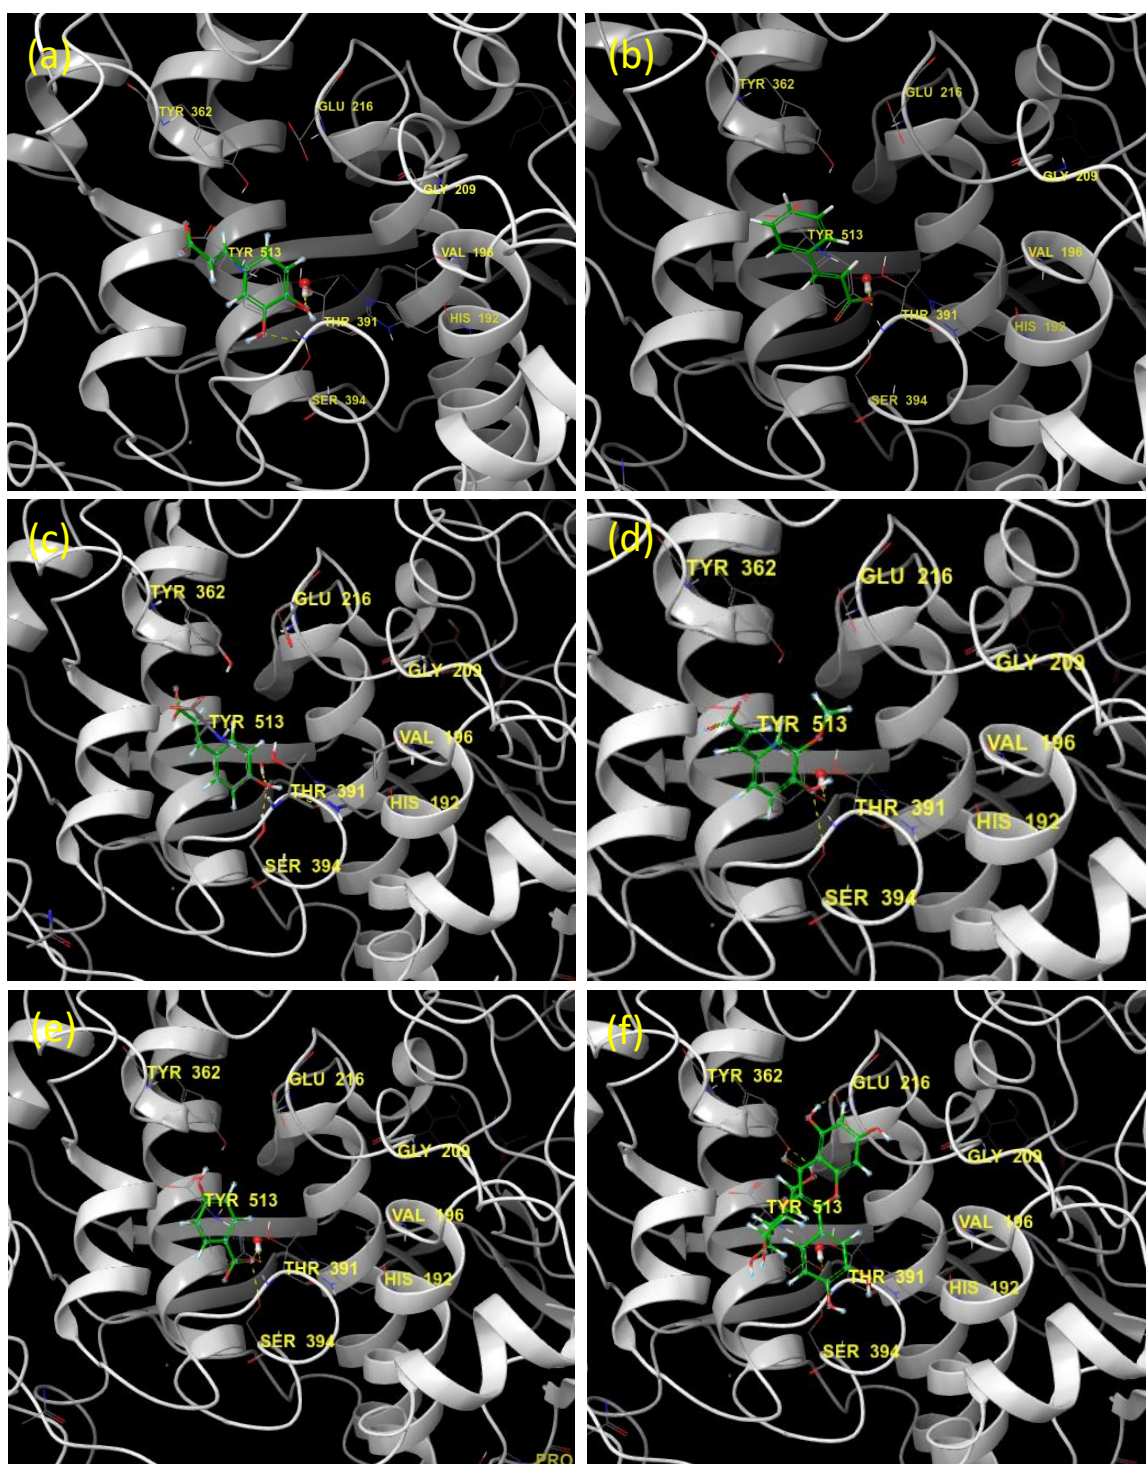

**Figure S 13:** Three-dimensional protein-ligand interactions of (a) caffeic acid, (b) cinnamic acid, (c) *p*-coumaric acid, (d) ferulic acid, (e) 4-hydroxybenzoic acid and (f) isoquercetrin with the 5M8P tyrosinase protein 1 structure (<https://www.schrodinger.com/maestro>; version 12.1.013, release 2019-3).



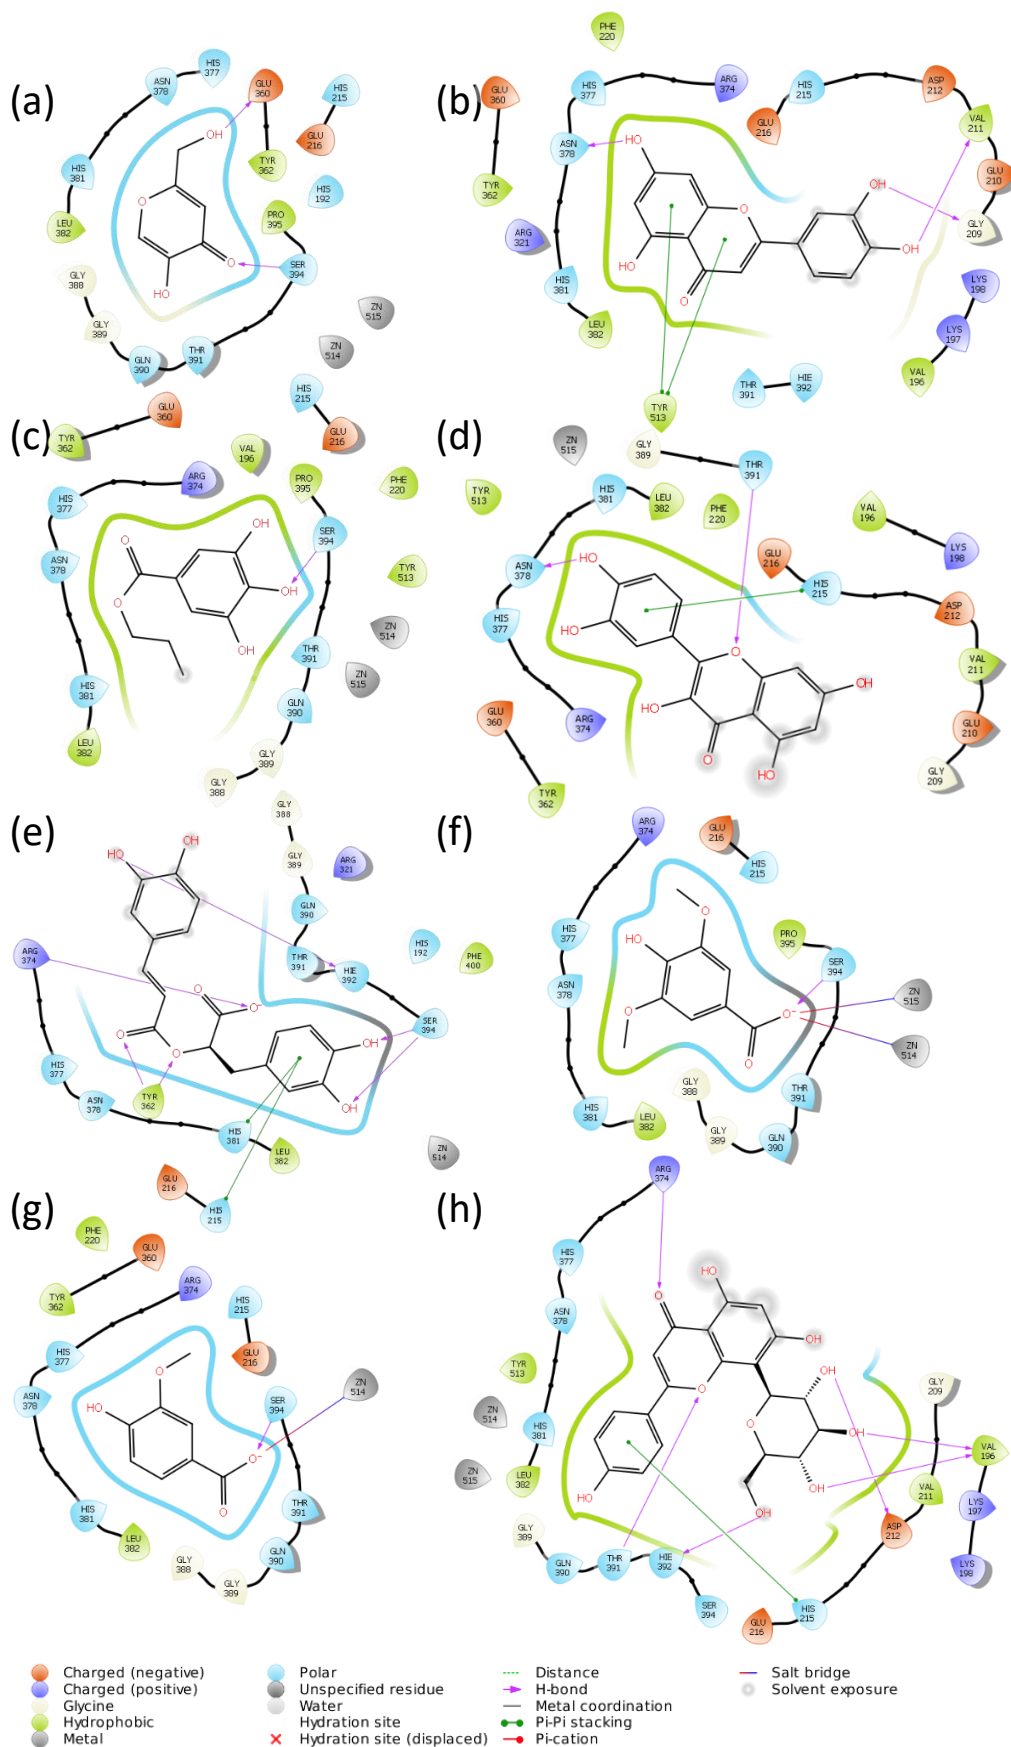

**Figure S 14:** Two-dimensional protein-ligand interactions of (a) kojic acid, (b) luteolin, (c) *n*-propyl gallate, (d) quercetin, (e) rosmarinic acid, (f) syringic acid, (g) vanillic acid and (h) vitexin with the 5M8P tyrosinase protein 1 structure (<https://www.schrodinger.com/maestro>; version 12.1.013, release 2019-3).

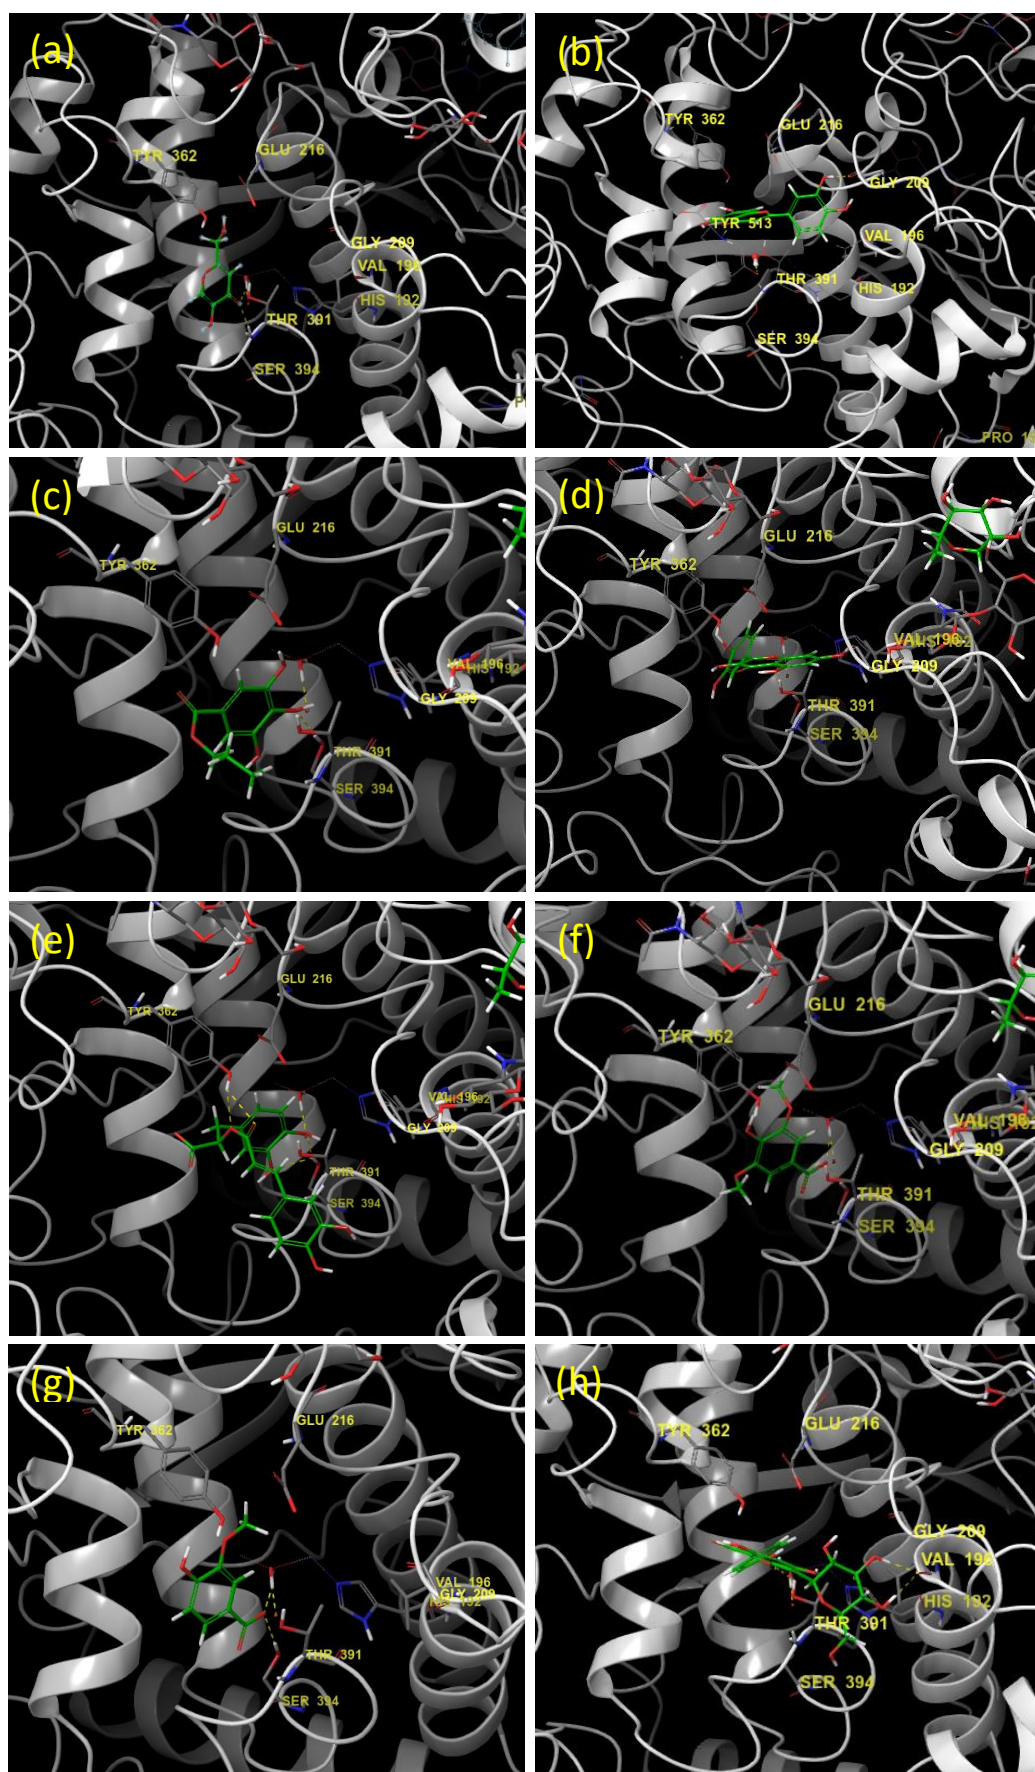

**Figure S 15:** Three-dimensional protein-ligand interactions of (a) kojic acid, (b) luteolin, (c) *n*-propyl gallate, (d) quercetin, (e) rosmarinic acid, (f) syringic acid, (g) vanillic acid and (h) vitexin with the 5M8P tyrosinase protein 1 structure (<https://www.schrodinger.com/maestro>; version 12.1.013, release 2019-3).

**Table S 4.** Hydrogen bond lengths between the compounds and the amino acids at the active site of the tyrosinase-related protein 1 structure (PBD: 5M8P) (<https://www.schrodinger.com/maestro; version 12.1.013, release 2019-3>).

| Compounds                     | Hydrogen bond lengths 5M8P |            |            |            |            |            |            |            |            |            |            |            |            |            |            |            |
|-------------------------------|----------------------------|------------|------------|------------|------------|------------|------------|------------|------------|------------|------------|------------|------------|------------|------------|------------|
|                               | GLY<br>209                 | GLU<br>216 | TYR<br>362 | GLY<br>388 | SER<br>394 | ASN<br>378 | VAL<br>196 | ARG<br>321 | GLY<br>389 | HIE<br>392 | VAL<br>211 | THR<br>391 | ARG<br>374 | VAL<br>196 | ASP<br>212 | GLU<br>360 |
| Aspalathin (1)                | 1.95                       | 2.03       | 2.14       | 2.42       | 2.27       |            |            |            |            |            |            |            |            |            |            |            |
| Caffeic acid (2)              |                            |            |            |            | 2.67       |            |            |            |            |            |            |            |            |            |            |            |
| Catechin (3)                  |                            |            |            |            |            | 1.86       | 1.80       |            |            |            |            |            |            |            |            |            |
| Cinnamic acid (4)             |                            |            |            |            |            |            |            |            |            |            |            |            |            |            |            |            |
| Ferulic acid (5)              |                            |            |            |            | 2.42       |            |            | 2.33       |            |            |            |            |            |            |            |            |
| 4-Hydroxybenzoic acid (6)     |                            |            |            |            | 1.97       |            |            |            |            |            |            |            |            |            |            |            |
| Isoquercitrin (7)             |                            | 1.79       | 1.79       |            |            |            |            | 1.89       | 2.39       |            |            |            |            |            |            |            |
| Luteolin (8)                  | 1.91                       |            |            |            |            | 1.89       |            |            |            | 2.06       |            |            |            |            |            |            |
| p-Coumaric acid (9)           |                            |            |            |            | 1.79       |            |            |            |            |            |            | 2.78       |            |            |            |            |
| <i>n</i> -Propyl gallate (10) |                            |            |            |            | 2.18       |            |            |            |            |            |            |            |            |            |            |            |
| Quercetin (11)                |                            |            |            |            |            | 2.00       |            |            |            |            |            | 2.11       |            |            |            |            |
| Rosmarinic acid (12)          |                            |            | 2.43       |            | 1.94       |            |            |            | 2.25       |            |            |            | 1.94       |            |            |            |
| Syringic acid (13)            |                            |            |            |            | 1.82       |            |            |            |            |            |            |            |            |            |            |            |
| Vanillic acid (14)            |                            |            |            |            | 2.05       |            |            |            |            |            |            |            |            |            |            |            |
| Vitexin (15)                  |                            |            |            |            |            |            |            |            | 2.21       |            | 2.51       | 1.96       | 1.86       | 2.38       |            |            |
| Kojic acid                    |                            |            |            |            | 1.96       |            |            |            |            |            |            |            |            |            |            | 2.34       |

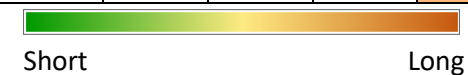

## S5 - Pearson correlation

The data obtained using the Pearson correlation is provided in Table S 5 and Figure S 16.

**Table S 5.** Pearson correlation, assuming a Gaussian distribution between the tyrosinase activity and the docking scores for the tyrosinase structure (PBD: 2Y9X) and for the tyrosinase related protein 1 structure (PBD: 5M8P) (<https://www.graphpad.com>; GraphPad Prism 5)

| Pearson Correlation                          |                                                                |                                                                |                                                  |
|----------------------------------------------|----------------------------------------------------------------|----------------------------------------------------------------|--------------------------------------------------|
|                                              | Correlation between Tyrosinase activity and 2Y9X docking score | Correlation between Tyrosinase activity and 5M8P docking score | Correlation between 2Y9X and 5M8P docking scores |
| Number of XY Pairs                           | 16                                                             | 16                                                             | 16                                               |
| Pearson r                                    | -0.5696                                                        | -0.4719                                                        | 0.7618                                           |
| 95% confidence interval                      | -0.8308 to -0.1028                                             | -0.7842 to 0.03119                                             | 0.4275 to 0.9128                                 |
| P value (two-tailed)                         | 0.0213                                                         | 0.065                                                          | 0.0006                                           |
| P value summary                              | *                                                              | ns                                                             | ***                                              |
| Is the correlation significant? (alpha=0.05) | Yes                                                            | No                                                             | Yes                                              |
| R squared                                    | 0.3244                                                         | 0.2227                                                         | 0.5804                                           |

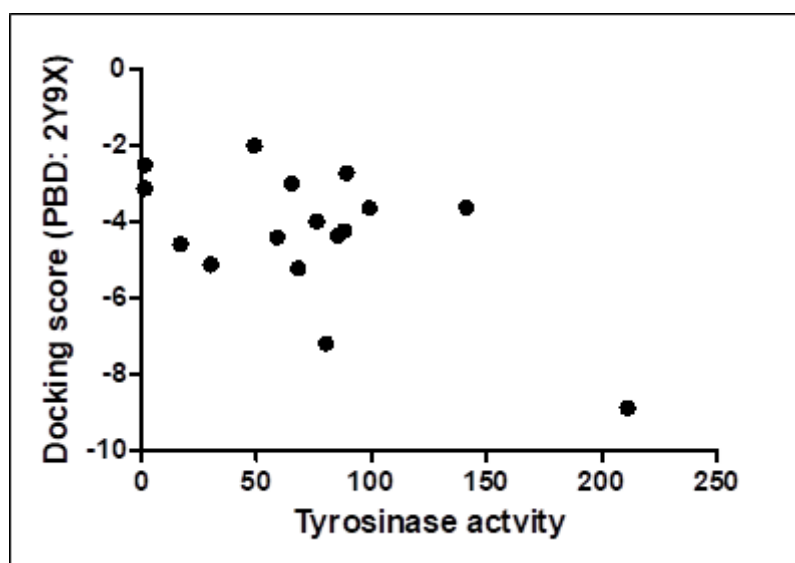

**Figure S 16:** Pearson correlation, assuming Gaussian distribution, between the tyrosinase activity and the docking scores for the tyrosinase structure (PBD: 2Y9X) (<https://www.graphpad.com>; GraphPad Prism 5).

## S6 - Quantitative Structure–Activity Relationship Model

The data obtained using the Quantitative Structure–Activity Relationship Model is provided in Table S 6 to S 9.

**Table S 6.** Structure Activity Relationship Table for the compounds identified in the ethanolic extract of *Aspalathus linearis* (Burm.f.) R.Dahlgren (<https://www.schrodinger.com/canvas>; version 4.1.013, release 2019-3).

CoRes: 

| Input # | Structure Name    | R1 | R2 | R3 | R4 | R5 | R6 | R7 | R8 | R9 | R10 |
|---------|-------------------|----|----|----|----|----|----|----|----|----|-----|
| 1       | Vanillic acid     |    |    |    |    |    |    |    |    |    |     |
| 2       | Quercetin         |    |    |    |    |    |    |    |    |    |     |
| 3       | P-Coumaric Acid   |    |    |    |    |    |    |    |    |    |     |
| 4       | Syringic acid     |    |    |    |    |    |    |    |    |    |     |
| 5       | Cinnamic Acid     |    |    |    |    |    |    |    |    |    |     |
| 6       | Caffeic Acid      |    |    |    |    |    |    |    |    |    |     |
| 7       | Aspalathin        |    |    |    |    |    |    |    |    |    |     |
| 8       | Luteolin          |    |    |    |    |    |    |    |    |    |     |
| 9       | Ferulic Acid      |    |    |    |    |    |    |    |    |    |     |
| 10      | Propyl Gallate    |    |    |    |    |    |    |    |    |    |     |
| 11      | (=)-catechin      |    |    |    |    |    |    |    |    |    |     |
| 12      | Rosmarinic Acid   |    |    |    |    |    |    |    |    |    |     |
| 13      | Isoquercitrin     |    |    |    |    |    |    |    |    |    |     |
| 14      | 4-Hydroxybenz...  |    |    |    |    |    |    |    |    |    |     |
| 15      | Vitexin           |    |    |    |    |    |    |    |    |    |     |
| 16      | Protocatechuic... |    |    |    |    |    |    |    |    |    |     |
| 17      | Kojic acid        |    |    |    |    |    |    |    |    |    |     |

**Table S 7.** The tyrosinase property activity cliffs of the R-group analysis of the compounds identified in the ethanolic extract of *Aspalathus linearis* (Burm.f.) R.Dahlgren (<https://www.schrodinger.com/canvas>; version 4.1.013, release 2019-3).

|   | Deviation | Structure 1                                                                                                | Structure 2                                                                                            | $\Delta$ Fingerprint | $ \Delta$ Property | <b>Deviation:</b><br>greater than 4<br>between 2 and 4<br>between -2 and 2<br>between -4 and -2<br>less than -4 |
|---|-----------|------------------------------------------------------------------------------------------------------------|--------------------------------------------------------------------------------------------------------|----------------------|--------------------|-----------------------------------------------------------------------------------------------------------------|
| 1 | 1.23      | 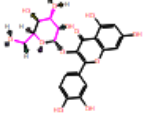<br>Isoquercitrin         | <br>Aspalathin        | 10.0                 | 131.0              |                                                                                                                 |
| 2 | -1.19     | <br>4-Hydroxybenzoic Acid | <br>Vanillic acid     | 5.0                  | 1.0                |                                                                                                                 |
| 3 | -1.9      | <br>Vitexin               | <br>Isoquercitrin     | 10.0                 | 12.0               |                                                                                                                 |
| 4 | 1.29      | <br>Vitexin             | <br>Aspalathin      | 8.94                 | 143.0              |                                                                                                                 |
| 5 | -1.16     | <br>Cinnamic Acid       | <br>P-Coumaric Acid | 4.47                 | 47.5               |                                                                                                                 |
| 6 | -0.66     | <br>Ferulic Acid        | <br>P-Coumaric Acid | 5.83                 | 63.5               |                                                                                                                 |

**Table S 8.** The docking score for the tyrosinase structure (PBD: 2Y9X) property activity cliffs of the R-group analysis of the compounds identified in the ethanolic extract of *Aspalathus linearis* (Burm.f.) R.Dahlgren (<https://www.schrodinger.com/canvas>; version 4.1.013, release 2019-3).

|   | Deviation | Structure 1                                                                                                         | Structure 2                                                                                                     | $\Delta$ Fingerprint | $\Delta$ Property | <b>Deviation:</b><br>greater than 4<br>between 2 and 4<br>between -2 and 2<br>between -4 and -2<br>less than -4 |
|---|-----------|---------------------------------------------------------------------------------------------------------------------|-----------------------------------------------------------------------------------------------------------------|----------------------|-------------------|-----------------------------------------------------------------------------------------------------------------|
| 1 | 1.39      | -7.19<br>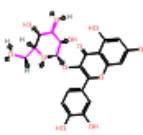<br>Isoquercitrin         | -8.88<br><br>Aspalathin        | 11.27                | 1.69              |                                                                                                                 |
| 2 | -1.21     | -2.71<br><br>4-Hydroxybenzoic Acid | -4.24<br><br>Vanillic acid     | 5.29                 | 1.53              |                                                                                                                 |
| 3 | 0.99      | -5.21<br><br>Vitexin              | -7.19<br><br>Isoquercitrin    | 10.86                | 1.98              |                                                                                                                 |
| 4 | 1.82      | -5.21<br><br>Vitexin             | -8.88<br><br>Aspalathin      | 10.82                | 3.67              |                                                                                                                 |
| 5 | -1.15     | -2.00<br><br>Cinnamic Acid       | -2.51<br><br>P-Coumaric Acid | 4.58                 | 0.51              |                                                                                                                 |
| 6 | -0.99     | -2.99<br><br>Cinnamic Acid       | -2.51<br><br>P-Coumaric Acid | 6.0                  | 0.48              |                                                                                                                 |



**Table S 9.** The docking score for the tyrosinase related protein 1 structure (PBD: 5M8P) property activity cliffs of the R-group analysis of the compounds identified in the ethanolic extract of *Aspalathus linearis* (Burm.f.) R.Dahlgren (<https://www.schrodinger.com/canvas>; version 4.1.013, release 2019-3).

| Deviation | Structure 1                                                                                                          | Structure 2                                                                                                     | $\Delta$ Fingerprint | $\Delta$ Property | <b>Deviation:</b><br>greater than 4<br>between 2 and 4<br>between -2 and 2<br>less than -4 |
|-----------|----------------------------------------------------------------------------------------------------------------------|-----------------------------------------------------------------------------------------------------------------|----------------------|-------------------|--------------------------------------------------------------------------------------------|
| 1 1.19    | 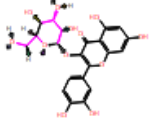<br>Isoquercitrin                   | <br>Aspalathin                 | 11.27                | 200.0             |                                                                                            |
| 2 1.49    | 258.10<br><br>4-Hydroxybenzoic Acid | 0.0<br><br>Vanillic acid       | 5.29                 | 258.1             |                                                                                            |
| 3 -1.53   | 200.00<br><br>Vitexin               | 200.00<br><br>Isoquercitrin    | 10.86                | 0.0               |                                                                                            |
| 4 1.08    | 200.00<br><br>Vitexin             | 0.0<br><br>Aspalathin        | 10.82                | 200.0             |                                                                                            |
| 5 -1.14   | 139.80<br><br>Cinnamic Acid       | 25.03<br><br>P-Coumaric Acid | 4.58                 | 114.77            |                                                                                            |
| 6 -1.25   | 0.0<br><br>Ferulic Acid           | 25.03<br><br>P-Coumaric Acid | 6.0                  | 25.03             |                                                                                            |

## S7 - Antiproliferation Assay

The data obtained for the antiproliferation assay is provided in Table S 10.

**Table S 10.** Sigmoidal dose response curve analysis of the ethanolic extract of *Aspalathus linearis* (Burm.f.) R.Dahlgren (AL), its fractions and the compounds aspalathin and catechin (<https://www.graphpad.com>; GraphPad Prism 5)

| <b>Sigmoidal dose-response (variable slope)</b> |                  |                 |                |                       |                  |                |                 |                   |                  |
|-------------------------------------------------|------------------|-----------------|----------------|-----------------------|------------------|----------------|-----------------|-------------------|------------------|
| <b>Best-fit values</b>                          | <b>AL</b>        | <b>DCM</b>      | <b>Acetic</b>  | <b>H<sub>2</sub>O</b> | <b>EtAc</b>      | <b>EtOH</b>    | <b>Hexane</b>   | <b>Aspalathin</b> | <b>Catechin</b>  |
| Bottom                                          | 0                | 0               | 0              | 0                     | 0                | 0              | 0               | 0                 | 0                |
| Top                                             | 100              | 100             | 100            | 100                   | 100              | 100            | 100             | 100               | 100              |
| LogEC <sub>50</sub>                             | 2.22             | 2.10            | 2.32           | 2.56                  | 2.37             | 2.36           | 2.09            | 2.34              | 2.22             |
| HillSlope                                       | -2.18            | -2.67           | -1.76          | -1.93                 | -4.45            | -2.19          | -2.18           | -5.86             | -3.06            |
| EC <sub>50</sub>                                | 164.80           | 126.50          | 208.50         | 359.60                | 231.70           | 230.70         | 123.20          | 217.70            | 166.20           |
| <b>Std. Error</b>                               |                  |                 |                |                       |                  |                |                 |                   |                  |
| LogEC <sub>50</sub>                             | 0.05             | 0.06            | 0.03           | 0.06                  | 0.04             | 0.04           | 0.07            | 0.08              | 0.03             |
| HillSlope                                       | 0.48             | 0.83            | 0.23           | 0.53                  | 2.08             | 0.37           | 0.67            | 11.81             | 0.71             |
| <b>95% CI (profile likelihood)</b>              |                  |                 |                |                       |                  |                |                 |                   |                  |
| LogEC <sub>50</sub>                             | 2.12 to 2.32     | 1.99 to 2.22    | 2.25 to 2.39   | 2.44 to 2.704         | 2.28 to 2.44     | 2.28 to 2.44   | 1.95 to 2.24    | 2.16 to 2.52      | 2.15 to 2.29     |
| HillSlope                                       | -3.36 to -1.51   | -6.36 to -1.69  | -2.33 to -1.34 | -3.34 to -1.19        | 6.76 to -2.31    | -3.42 to -1.51 | -4.33 to -1.34  | -32.17 to 20.46   | -4.63 to -1.48   |
| EC <sub>50</sub>                                | 130.30 to 208.80 | 96.55 to 166.60 | 177 to 245.50  | 274.80 to 505.60      | 188.50 to 275.40 | 192 to 274     | 88.26 to 174.40 | 144.50 to 328.00  | 140.30 to 196.80 |
| <b>Goodness of Fit</b>                          |                  |                 |                |                       |                  |                |                 |                   |                  |
| Degrees of Freedom                              | 22               | 22              | 22             | 22                    | 22               | 22             | 22              | 10                | 10               |
| R square                                        | 0.89             | 0.87            | 0.92           | 0.76                  | 0.86             | 0.90           | 0.82            | 0.67              | 0.89             |
| Absolute Sum of Squares                         | 4313             | 6943            | 1671           | 4735                  | 5569             | 2349           | 8685            | 2130              | 1203             |
| Sy.x                                            | 14.00            | 17.77           | 8.71           | 14.67                 | 15.91            | 10.33          | 19.87           | 14.60             | 10.97            |
| <b>Constraints</b>                              |                  |                 |                |                       |                  |                |                 |                   |                  |
| Bottom                                          | 0                | 0               | 0              | 0                     | 0                | 0              | 0               | 0                 | 0                |
| Top                                             | 100              | 100             | 100            | 100                   | 100              | 100            | 100             | 100               | 100              |
| Number of points analysed                       | 24               | 24              | 24             | 24                    | 24               | 24             | 24              | 12                | 12               |

## S8 - Masson Fontana Assay

The data obtained for the Masson Fontana assay is provided in Table S 11.

**Table S 11.** One-way analysis of variance and the post-hoc statistical analyses (Tukey's multiple comparison tests) of the number of melanin produced in melanocytes (UCT-Mel1) treated with the ethanolic extract of *Aspalathus linearis* (Burm.f.) R.Dahlgren (AL), its fractions and the compounds aspalathin and catechin vs the untreated (negative) melanocytes (<https://www.graphpad.com>; GraphPad Prism 5)

| One-way analysis of variance            |          |            |       |                        |         |                   |
|-----------------------------------------|----------|------------|-------|------------------------|---------|-------------------|
| P value                                 | P<0.0001 |            |       |                        |         |                   |
| P value summary                         | ***      |            |       |                        |         |                   |
| Are means signif. different? (P < 0.05) | Yes      |            |       |                        |         |                   |
| Number of groups                        | 11       |            |       |                        |         |                   |
| F                                       | 7.028    |            |       |                        |         |                   |
| R squared                               | 0.5273   |            |       |                        |         |                   |
| ANOVA Table                             |          | SS         | df    | MS                     |         |                   |
| Treatment (between columns)             |          | 1511       | 10    | 151.1                  |         |                   |
| Residual (within columns)               |          | 1355       | 63    | 21.5                   |         |                   |
| Total                                   |          | 2866       | 73    |                        |         |                   |
| Dunnett's Comparison Test               | Multiple | Mean Diff. | q     | Significant? P < 0.05? | Summary | 95% CI of diff    |
| Negative vs aMSH 4.5uM                  |          | -7.413     | 2.841 | Yes                    | *       | -14.71 to -0.1129 |
| Negative vs aMSH 9uM                    |          | -9.156     | 4.51  | Yes                    | ***     | -14.83 to -3.476  |
| Negative vs aMSH 18uM                   |          | -15.06     | 5.771 | Yes                    | ***     | -22.36 to -7.760  |
| Negative vs AL                          |          | -9.23      | 4.875 | Yes                    | ***     | -14.53 to -3.934  |
| Negative vs AcOH                        |          | -9.572     | 4.273 | Yes                    | ***     | -15.84 to -3.306  |
| Negative vs EtOAc                       |          | -9.107     | 3.49  | Yes                    | **      | -16.41 to -1.807  |
| Negative vs EtOH                        |          | -11.17     | 4.663 | Yes                    | ***     | -17.86 to -4.467  |
| Negative vs H <sub>2</sub> O            |          | -8.718     | 4.107 | Yes                    | **      | -14.66 to -2.780  |
| Negative vs Aspalathin                  |          | -8.382     | 3.742 | Yes                    | **      | -14.65 to -2.116  |
| Negative vs Catechin                    |          | -15.08     | 6.297 | Yes                    | ***     | -21.78 to -8.380  |
